# Supplementary material for: Box-Counting Dimension Revisited: Presenting an Efficient Method of Minimizing Quantization Error and an Assessment of the Self-Similarity of Structural Root Systems
Source: PubMed Central journal article supplement (PMC4758026; doi:10.3389/fpls.2016.00149), 2016-02-18
Supplement: Table1.pdf [file Table1.pdf]

## ***Supplementary Material:*** **Box-counting dimension revisited: presenting an efficient method of minimising quantisation error and an assessment of the self-similarity of structural root systems**

**Martin Bouda\***, Joshua S. Caplan and James E. Saiers

\*Correspondence:  
 Martin Bouda  
 martin.bouda@yale.edu

### **SUPPLEMENTARY TABLE 1**

Summary of plant box-counting studies, with a focus on root systems, indicating how self-similarity was supported in each study and how quantisation error was dealt with.

| Reference                 | Object                                                              | Suggested utility of FD                                                                      | Accounts for quantisation error | Support for self-similarity                                           |
|---------------------------|---------------------------------------------------------------------|----------------------------------------------------------------------------------------------|---------------------------------|-----------------------------------------------------------------------|
| Tatsumi et al. (1989)     | Root systems of crop species                                        | Characterise branching and morphology in a simple and quantitative way                       | No                              | Quality of fit by linear regression ( $R^2$ , p-value)                |
| Eghball et al. (1993)     | Root systems of <i>Zae mays</i> L.                                  | Quantify branching intensity in relation to resource (N) acquisition                         | No                              | By assumption                                                         |
| Lynch and Vanbeem (1993)  | Root systems of different <i>Phaseolus vulgaris</i> L. genotypes    | Characterise branching intensity; theoretical implications for adaptation                    | No                              | By assumption                                                         |
| Berntson (1994)           | Tracings of <i>Betula spp.</i> roots                                | Methodological discussion                                                                    | No                              | By assumption                                                         |
| Berntson and Stoll (1997) | Mathematical fractals and <i>Solidago altissima</i> L. root systems | Quantify space-filling properties of structures                                              | No                              | Tested via curvilinearity of regression residuals; nonlinearity found |
| Nielsen et al. (1997)     | Simulated roots                                                     | Quantify root system architecture in regard to mechanical and resource acquisition functions | No                              | By assumption                                                         |

Summary of plant box-counting studies, with a focus on root systems, indicating how self-similarity was supported in each study and how quantisation error was dealt with.

| Reference                         | Object                                                                            | Suggested utility of FD                                                                 | Accounts for quantisation error | Support for self-similarity                   |
|-----------------------------------|-----------------------------------------------------------------------------------|-----------------------------------------------------------------------------------------|---------------------------------|-----------------------------------------------|
| Eshel (1998)                      | Root systems of <i>Lycopersicon esculentum</i> Mill.                              | Quantify complexity and branching characteristic                                        | No                              | By assumption                                 |
| Masi and Maranville (1998)        | Root systems of <i>Sorghum bicolor</i> L. genotypes                               | Differentiate root systems of different genotypes                                       | No                              | By assumption                                 |
| Nielsen et al. (1999)             | Root systems of <i>Phaseolus vulgaris</i> L.                                      | Evaluate space-filling and thus soil exploration as a means of addressing P acquisition | No                              | By assumption                                 |
| Oppelt et al. (2000)              | Coarse root systems of African tree species                                       | Elucidate architectural and life-history strategies                                     | No                              | Quality of fit by linear regression ( $R^2$ ) |
| Ketipearachchi and Tatsumi (2000) | Root systems of six legume species                                                | Characterise root system morphology and architecture                                    | No                              | Disregarded                                   |
| Izumi and Iijima (2002)           | Root systems of <i>Manihot esculenta</i> Crantz                                   | Understand root habit for application in intercropping systems                          | No                              | By assumption                                 |
| Dzierzon et al. (2003)            | <i>Pinus sylvestris</i> L. stems, real and simulated                              | Quantify space-filling properties                                                       | No                              | By assumption                                 |
| Bari et al. (2004)                | Root systems of <i>Olea europaea</i> L. cultivars                                 | Link FD to water use efficiency                                                         | No                              | By assumption                                 |
| Walk et al. (2004)                | Simulated root systems                                                            | Evaluate efficiency of soil exploration                                                 | No                              | By assumption                                 |
| Dannowski and Block (2005)        | Root systems of entire plant communities                                          | Quantify complexity with a view to structural efficiency, water and nutrient flows      | No                              | By assumption, due to repetitive branching    |
| Lontoc-Roy et al. (2005)          | Root systems of <i>Zea mays</i> L.                                                | Quantify complexity with a view to characterising development                           | Brute force: 12 transl.         | Quality of regression ( $R^2$ )               |
| Da Silva et al. (2006)            | Digitised and simulated canopies of <i>Prunus persica</i> L. foliage, cantor dust | Methodological study                                                                    | Scale cut-off                   | By assumption                                 |
| Lontoc-Roy et al. (2006)          | Root systems of <i>Zea mays</i> L.                                                | Quantify complexity                                                                     | Brute force: 12 transl.         | Multiple scale ranges to maximise $R^2$       |

Summary of plant box-counting studies, with a focus on root systems, indicating how self-similarity was supported in each study and how quantisation error was dealt with.

| Reference                  | Object                                                | Suggested utility of FD                                                                              | Accounts for quantisation error | Support for self-similarity                       |
|----------------------------|-------------------------------------------------------|------------------------------------------------------------------------------------------------------|---------------------------------|---------------------------------------------------|
| Dutilleul et al. (2008)    | Skeletonised canopies of <i>Thuja occidentalis</i> L. | Link canopy complexity to light interception                                                         | Unclear                         | By assumption                                     |
| Han et al. (2008)          | Root systems of <i>Solanum tuberosum</i> L.           | Measure effect of soil pathogen on space occupancy                                                   | Brute force                     | Quality of fit by regression ( $R^2$ )            |
| Manschadi et al. (2008)    | Root systems of <i>Triticum aestivum</i> L. genotypes | Quantify branching intensity with a view to resource acquisition and breeding for drought resistance | No                              | By assumption                                     |
| Barto and Cipollini (2009) | Root systems of <i>Impatiens pallida</i> Nutt.        | Quantify effect of invasive-removal techniques on subsequent colonisation                            | No                              | By assumption                                     |
| Dibble and Thomaz (2009)   | Shoots of aquatic plants                              | Quantify complexity of macroinvertebrate habitats                                                    | No                              | By assumption                                     |
| Wang et al. (2009)         | Root systems of <i>Oryza sativa</i> L. genotypes      | Quantify architecture and drought response with a view to drought adaptation of crops                | No                              | By assumption                                     |
| Grift et al. (2011)        | Root systems of <i>Zea mays</i> L.                    | Crop phenotyping                                                                                     | No                              | By assumption                                     |
| Ferreiro et al. (2013)     | Shoots of aquatic plants                              | Quantify complexity of macroinvertebrate habitat                                                     | Brute force, extent unclear     | By assumption                                     |
| Pierce et al. (2013)       | Roots of <i>Salix nigra</i> Marsh.                    | Quantify effect of soil saturation (redox potential)                                                 | Brute force by random walk      | By assumption                                     |
| Aagaard and Hartvig (2014) | Plant community canopies                              | Assess complexity of canopies across vegetation types and successional stages                        | No                              | By assumption                                     |
| Yang et al. (2014)         | Shoots of <i>Robinia pseudoacacia</i> L.              | Evaluate effect of mycorrhizal infection                                                             | No                              | By assumption and quality of regression ( $R^2$ ) |
| Dutilleul et al. (2015)    | Crowns of miniature coniferous trees                  | Link canopy complexity to light interception                                                         | Brute force, 8 transl.          | Two scale ranges imposed to maximise $R^2$ fit    |
| Subramanian et al. (2015)  | Root systems of <i>Zea mays</i> L.                    | Assess the effects of salinity stress                                                                | Brute force                     | Quality of fit by regression ( $R^2$ )            |

## REFERENCES

- Aagaard, K. and Hartvigsen, G. (2014). Assessing spatial patterns of plant communities at varying stages of succession. *Applied Mathematics* 5, 1842–1851. doi:10.4236/am.2014.512177
- Bari, A., Ayad, G., Martin, A., Gonzalez-Andujar, J., Nachit, M., and Elouafi, I. (2004). Fractals and plant water use efficiency. In *Thinking in Patterns: fractals and related phenomena in nature*, ed. M. Novak. 315–316. doi:10.1142/9789812702746\\_0029. 8th International Conference on Thinking in Patterns -Fractals and Related Phenomena in Nature, Vancouver, CANADA, APR 04-07, 2004
- Barto, E. K. and Cipollini, D. (2009). Garlic mustard (*alliararia petiolata*) removal method affects native establishment. *Invasive Plant Science and Management* 2, 230–236. doi:10.1614/IPSM-09-011.1
- Berntson, G. (1994). Root systems and fractals - how reliable are calculations of fractal dimensions. *Annals of Botany* 73, 281–284. doi:10.1006/anbo.1994.1033
- Berntson, G. and Stoll, P. (1997). Correcting for finite spatial scales of self-similarity when calculating the fractal dimensions of real-world structures. *Proceedings of the Royal Society B-Biological Sciences* 264, 1531–1537
- Da Silva, D., Boudon, F., Godin, C., Puech, O., Smith, C., and Sinoquet, H. (2006). A critical appraisal of the box counting method to assess the fractal dimension of tree crowns. In *Advances in Visual Computing, PT 1*, eds. G. Bebis, R. Boyle, B. Parvin, D. Koracin, P. Remagnino, A. Nefian, G. Meenakshisundaram, V. Pascucci, J. Zara, J. Molineros, H. Theisel, and T. Malzbender. vol. 4291 of *Lecture Notes in Computer Science*, 751–760. 2nd International Symposium on Visual Computing, Lake Tahoe, NV, NOV 06-08, 2006
- Dannowski, M. and Block, A. (2005). Fractal geometry and root system structures of heterogeneous plant communities. *Plant and Soil* 272, 61–76. doi:10.1007/s11104-004-3981-2
- Dibble, E. D. and Thomaz, S. M. (2009). Use of fractal dimension to assess habitat complexity and its influence on dominant invertebrates inhabiting tropical and temperate macrophytes. *Journal of Freshwater Ecology* 24, 93–102. doi:10.1080/02705060.2009.9664269
- Dutilleul, P., Han, L., and Smith, D. L. (2008). Plant light interception can be explained via computed tomography scanning: Demonstration with pyramidal cedar (*Thuja occidentalis*, *fastigiata*). *Annals of Botany* 101, 19–23. doi:10.1093/aob/mcm273
- Dutilleul, P., Han, L., Valladares, F., and Messier, C. (2015). Crown traits of coniferous trees and their relation to shade tolerance can differ with leaf type: a biophysical demonstration using computed tomography scanning data. *Frontiers in Plant Science* 6. doi:10.3389/fpls.2015.00172
- Dzierzon, H., Sievanen, R., Kurth, W., Perttunen, J., and Sloboda, B. (2003). Enhanced possibilities for analyzing tree structure as provided by an interface between different modelling systems. *Silva Fennica* 37, 31–44
- Eghball, B., Settmi, J., Maranville, J., and Parkhurst, A. (1993). Fractal analysis for morphological description of corn roots under nitrogen stress. *Agronomy Journal* 85, 287–289
- Eshel, A. (1998). On the fractal dimensions of a root system. *Plant, Cell and Environment* 21, 247–251. doi:10.1046/j.1365-3040.1998.00252.x
- Ferreiro, N., Giorgi, A., and Feijoo, C. (2013). Effects of macrophyte architecture and leaf shape complexity on structural parameters of the epiphytic algal community in a pampean stream. *Aquatic Ecology* 47, 389–401. doi:10.1007/s10452-013-9452-1
- Grift, T. E., Novais, J., and Bohn, M. (2011). High-throughput phenotyping technology for maize roots. *Biosystems Engineering* 110, 40–48. doi:10.1016/j.biosystemseng.2011.06.004

- Han, L., Dutilleul, P., Prasher, S. O., Beaulieu, C., and Smith, D. L. (2008). Assessment of common scab-inducing pathogen effects on potato underground organs via computed tomography scanning. *Phytopathology* 98, 1118–1125. doi:10.1094/PHYTO-98-10-1118
- Izumi, Y. and Iijima, M. (2002). Fractal and multifractal analysis of cassava root system grown by the root-box method. *Plant Production Science* 5, 146–151
- Ketipearachchi, K. W. and Tatsumi, J. (2000). Local fractal dimensions and multifractal analysis of the root system of legumes. *Plant Production Science* 3, 289–295
- Lontoc-Roy, M., Dutilleul, P., Prasher, S., Han, L., and Smith, D. (2005). Computed tomography scanning for three-dimensional imaging and complexity analysis of developing root systems. *Canadian Journal of Botany-Revue Canadienne de Botanique* 83, 1434–1442. doi:10.1139/b05-118
- Lontoc-Roy, M., Dutilleul, P., Prasher, S. O., Han, L., Brouillet, T., and Smith, D. L. (2006). Advances in the acquisition and analysis of ct scan data to isolate a crop root system from the soil medium and quantify root system complexity in 3-d space. *Geoderma* 137, 231–241. doi:10.1016/j.geoderma.2006.08.025
- Lynch, J. and Vanbeem, J. (1993). Growth and architecture of seedling roots of common bean genotypes. *Crop Science* 33, 1253–1257
- Manschadi, A. M., Hammer, G. L., Christopher, J. T., and deVoil, P. (2008). Genotypic variation in seedling root architectural traits and implications for drought adaptation in wheat (*triticum aestivum* L.). *Plant and Soil* 303, 115–129. doi:10.1007/s11104-007-9492-1
- Masi, C. and Maranville, J. (1998). Evaluation of sorghum root branching using fractals. *Journal of Agricultural Science* 131, 259–265. doi:10.1017/S0021859698005826
- Nielsen, K., Lynch, J., and Weiss, H. (1997). Fractal geometry of bean root systems: Correlations between spatial and fractal dimension. *American Journal of Botany* 84, 26–33. doi:10.2307/2445879
- Nielsen, K., Miller, C., Beck, D., and Lynch, J. (1999). Fractal geometry of root systems: Field observations of contrasting genotypes of common bean (*phaseolus vulgaris* L.) grown under different phosphorus regimes. *Plant and Soil* 206, 181–190
- Oppelt, A., Kurth, W., Dzierzon, H., Jentschke, G., and Godbold, D. (2000). Structure and fractal dimensions of root systems of four co-occurring fruit tree species from botswana. *Annals of Forest Science* 57, 463–475. 2nd International Workshop on Functional-Structural Tree Models, Clermont Ferra, France, Oct 12-14, 1998
- Pierce, S. C., Koontz, M. B., Pezeshki, S. R., and Kroeger, R. (2013). Response of *salix nigra* [Marsh.] cuttings to horizontal asymmetry in soil saturation. *Environmental and Experimental Botany* 87, 137–147. doi:10.1016/j.envexpbot.2012.10.003
- Subramanian, S., Han, L., Dutilleul, P., and Smith, D. L. (2015). Computed tomography scanning can monitor the effects of soil medium on root system development: an example of salt stress in corn. *Frontiers in Plant Science* 6. doi:10.3389/fpls.2015.00256
- Tatsumi, J., Yamauchi, A., and Kono, Y. (1989). Fractal analysis of plant-root systems. *Annals of Botany* 64, 499–503
- Walk, T., Van Erp, E., and Lynch, J. (2004). Modelling applicability of fractal analysis to efficiency of soil exploration by roots. *Annals of Botany* 94, 119–128. doi:10.1093/aob/mch116
- Wang, H., Siopongco, J., Wade, L. J., and Yamauchi, A. (2009). Fractal analysis on root systems of rice plants in response to drought stress. *Environmental and Experimental Botany* 65, 338–344. doi:10.1016/j.envexpbot.2008.10.002
- Yang, Y., Tang, M., Sulpice, R., Chen, H., Tian, S., and Ban, Y. (2014). Arbuscular mycorrhizal fungi alter fractal dimension characteristics of *Robinia pseudoacacia* L. seedlings through regulating plant

growth, leaf water status, photosynthesis, and nutrient concentration under drought stress. *Journal of Plant Growth Regulation* 33, 612–625. doi:10.1007/s00344-013-9410-0
